# Supplementary material for: Systematic transcriptomic analysis of childhood medulloblastoma identifies N6- methyladenosine-dependent lncRNA signatures associated with molecular subtype, immune cell infiltration, and prognosis
Source: Research Square preprint supplement (doi:10.21203/rs.3.rs-4810070/v1), 2024-09-02
Supplement: Supplementary file 1 [file 178ba8a3494b420b072ceb95.xlsx]

## Sheet: Sheet1
ML model	Min.	1st Qu.	Median	Mean	3rd Qu.	Max.
RF	0.866667	0.913407	0.934211	0.930839	0.947368	0.973333
GBM	0.906667	0.933499	0.947368	0.945039	0.960263	0.973333
C50	0.84	0.893333	0.894737	0.900733	0.919459	0.946667
LDA	0.932432	0.953947	0.973333	0.967144	0.98	0.986842
GLMNET	0.96	0.96	0.972973	0.969858	0.973684	0.986842
KNN	0.878378	0.894035	0.933333	0.924628	0.947017	0.972973
SVM	0.945946	0.96	0.972973	0.966314	0.973333	0.986842
XGBOOST	0.906667	0.927193	0.946667	0.949472	0.973329	0.986842
