# Supplementary material for: Systematic transcriptomic analysis of childhood medulloblastoma identifies N6- methyladenosine-dependent lncRNA signatures associated with molecular subtype, immune cell infiltration, and prognosis
Source: Research Square preprint supplement (doi:10.21203/rs.3.rs-4810070/v1), 2024-09-02
Supplement: Supplementary file 4 [file 411834e7f335fadd07c79426.xlsx]

## Sheet: Sheet1
	Discovery cohort					Validation cohort
	Class: WNT	Class: SHH	Class: Grp3	Class: Grp4	Multi-class AUC	Class: WNT	Class: SHH	Class: Grp3	Class: Grp4	Multi-class AUC
GLMNET	0.96	1	0.9333	0.988	0.97	0.82873	0.9255	0.7959	0.9206	0.88
SVM	0.96	0.9796	0.9655	0.988	0.988	0.82222	0.9276	0.8	0.9231	0.87
LDA	1	1	1	1	1	0.8306	0.9038	0.7744	0.885	0.86
XGBOOST	0.96	0.9583	0.8571	0.9647	0.955	0.82418	0.9155	0.8127	0.9148	0.88
GBM	0.96	0.9362	0.8387	0.9639	0.955	0.83243	0.9026	0.787	0.8976	0.87
