# Supplementary material for: Systematic transcriptomic analysis of childhood medulloblastoma identifies N6- methyladenosine-dependent lncRNA signatures associated with molecular subtype, immune cell infiltration, and prognosis
Source: Research Square preprint supplement (doi:10.21203/rs.3.rs-4810070/v1), 2024-09-02
Supplement: Supplementary file 5 [file bb2551fc4fa86892515e6956.xlsx]

## Sheet: Sheet1
Cell type	R	P-value
naïve T cells CD4	0.138951	0.0239494
Follicular helper T-cells	-0.126853	0.0394308
Eosinophils	-0.128786	0.0365002
